# Supplementary material
Source: PubMed Central journal article supplement (PMC4344836)
Supplement: NIHMS61701-supplement-2.pdf [file NIHMS61701-supplement-2.pdf]

**Supplementary Table 1. Primers used in this study**

| <b>Primer set</b>       | <b>Forward primer</b>                                     | <b>Reverse primer</b>                                  |
|-------------------------|-----------------------------------------------------------|--------------------------------------------------------|
| DR5v2                   | TAGTTGGAATAGGATTCGA                                       | AGTATGGAGTTGGATTTCGG                                   |
| pRPS5A                  | GGGGACAACCTTTGTATAGAAA<br>AGTTGCTGGTACCGGGCCATAA<br>TCGTG | GGGGACTGCTTTTTTGTACAAA<br>CTTGCGGTACCCGCCTGTGGTG<br>AG |
| pRPS5A:: DII (for R2D2) | TAGTTGGAATAGGATTCCTCGG<br>GCCATAATCGTGAGTAGA              | AGTATGGAGTTGGATTTCCTC<br>TCCGGGATGATCTCACCG            |
| pRPS5A::mDII (for R2D2) | TAGTTGGAATAGGGTTCGGGCC<br>ATAATCGTGAGTAGA                 | AGTATGGAGTTGGTTCTCTCC<br>GGGATGATCTCACCG               |
| qPCR_ <i>eGFP</i>       | ACGTAAACGGCCACAAGTTC                                      | AAGTCGTGCTGCTTCATGTG                                   |
| qPCR_ <i>tdTomato</i>   | ACCACCTGTCCTGGGGCAT                                       | GGCCATGTTGTTGCCTCGG                                    |
| qPCR_ <i>EEF1</i>       | CTGGAGGTTTTGAGGCTGGTAT                                    | CCAAGGGTGAAAGCAAGAAGA                                  |
| qPCR_ <i>GAPC</i>       | GAAGGGTGGTGCCAAGAAGGT<br>T                                | AGGGGAGCAAGGCAGTTAGTG<br>G                             |
| qPCR_ <i>eIF4a</i>      | CTCATCACCCTGACCTCTTAG<br>C                                | AACCTTCCACTTCTTCCGATAC<br>G                            |
